# Supplementary material for: Prenatal exposures and DNA methylation in newborns: a pilot study in Durban, South Africa
Source: Royal Society of Chemistry journal article supplement (doi:10.1039/c6em00074f), 2016-01-01
Supplement: c6em00074f1.pdf [file c6em00074f1.pdf]

**Supplementary Material for:**

Prenatal exposures and DNA methylation in newborns: A Pilot Study in Durban, South Africa

*Authors and Affiliations:*

Jaclyn M. Goodrich<sup>a</sup>, Poovendhree Reddy<sup>b</sup>, Rajen N. Naidoo<sup>c</sup>, Kareshma Asharam<sup>c</sup>, Stuart Batterman<sup>a</sup>, Dana C. Dolinoy<sup>a,d</sup>

<sup>a</sup> Department of Environmental Health Sciences, University of Michigan School of Public Health, Ann Arbor, MI USA

<sup>b</sup> Department of Community Health Studies, Durban University of Technology, Durban, South Africa

<sup>c</sup> Discipline of Occupational and Environmental Health, School of Nursing and Public Health, University of KwaZulu-Natal, Durban, South Africa

<sup>d</sup> Department of Nutritional Sciences, University of Michigan School of Public Health, Ann Arbor, MI USA

## SUPPLEMENTAL FIGURE

**Supplemental Figure 1. Cluster Analysis of the Most Variable CpG Sites by Race.** Subjects were clustered using a multi-dimensional scaling (MDS) algorithm based on the 1000 most variable CpG sites from the 450K analysis after pre-processing of the data (removal of cross-reactive, SNP-containing, and X and Y probes, background and dye bias correction, BMIQ, and batch adjustment). Subjects are colored by self-reported race (green 1=African, orange 2=White, purple 4=Coloured). Since the white subject (circled in red) clustered away from the rest and race is known to influence the epigenome, analyses were run without this subject.

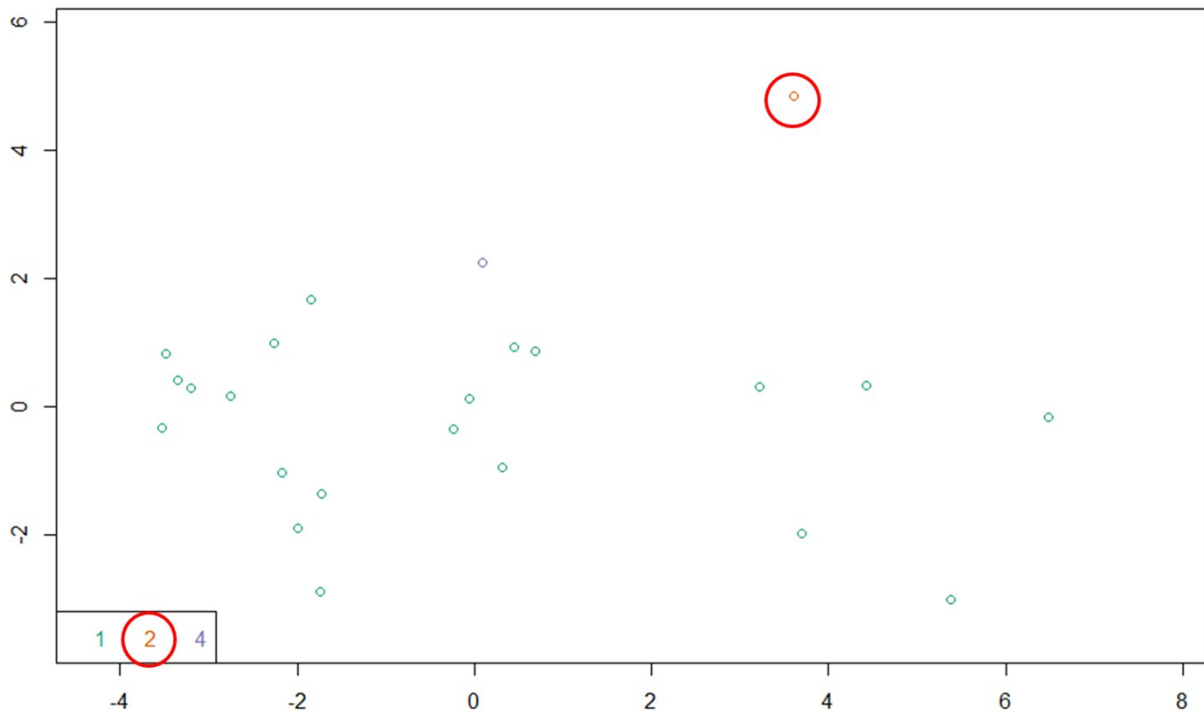

## SUPPLEMENTAL TABLES

**Supplemental Table I. Top Differentially Methylated Sites by Air Pollution Exposure Region (High, South Durban vs. Low, North Durban).** Results are shown from the model adjusting for gestational age, gender, and maternal HIV status (n=22).

Top sites were selected that had  $p < 0.0001$  in at least 2 models (by region of Durban, by region in model also adjusting for HIV, and by  $\text{NO}_x$  levels).

| Probe ID   | Gene Symbol     | Chr | Position  | log Fold Change* | P-Value  | adj. P-Value** | Relative to CpG Island | Annotation |
|------------|-----------------|-----|-----------|------------------|----------|----------------|------------------------|------------|
| cg00688840 |                 | 14  | 106363051 | 1.36             | 2.65E-07 | 0.11           | Open Sea               |            |
| cg02092102 |                 | 7   | 128555896 | -1.22            | 1.49E-05 | 0.83           | Island                 |            |
| cg25406779 | <i>CNTD2</i>    | 19  | 40732712  | -0.97            | 1.10E-05 | 0.83           | South Shore            | TSS 200    |
| cg27343801 | <i>NOVA2</i>    | 19  | 46444017  | -1.31            | 1.66E-05 | 0.83           | Island                 | Body       |
| cg20791839 | <i>SELK</i>     | 3   | 53926047  | -0.76            | 7.96E-06 | 0.83           | Island                 | TSS 200    |
| cg13436843 | <i>TRIM31</i>   | 6   | 30071601  | -0.93            | 2.62E-05 | 0.83           | South Shore            | Body       |
| cg24451081 | <i>F7</i>       | 13  | 113770401 | 0.69             | 3.59E-05 | 0.83           | North Shore            | Body       |
| cg27353629 |                 | 8   | 144309591 | -0.97            | 3.30E-05 | 0.83           | North Shelf            |            |
| cg18739405 | <i>KIAA1731</i> | 11  | 93394616  | -0.54            | 4.68E-05 | 0.83           | North Shore            | TSS 200    |
| cg24324441 | <i>MFSD1</i>    | 3   | 158519002 | -0.91            | 4.30E-05 | 0.83           | North Shore            | TSS 1500   |
| cg18551877 | <i>GLYATL2</i>  | 11  | 58612087  | 1.97             | 4.85E-05 | 0.83           | Open Sea               | TSS 200    |
| cg20905180 | <i>MTMR9</i>    | 8   | 11149412  | 1.48             | 4.95E-05 | 0.83           | Open Sea               | Body       |
| cg13388615 |                 | 2   | 242878809 | -1.52            | 1.77E-05 | 0.83           | Island                 |            |
| cg25398924 | <i>DLGAP2</i>   | 8   | 1460718   | 1.04             | 7.55E-05 | 0.89           | Open Sea               | 5' UTR     |
| cg06750897 | <i>PBX1</i>     | 1   | 164545553 | -0.86            | 6.48E-05 | 0.89           | Island                 | Body       |
| cg24051234 |                 | 10  | 111912029 | -3.95            | 5.52E-05 | 0.86           | Open Sea               |            |
| cg13710375 | <i>ZNF845</i>   | 19  | 53836837  | -1.13            | 9.64E-05 | 0.89           | Island                 | TSS 200    |
| cg06889422 | <i>GGT5</i>     | 22  | 24627294  | 0.61             | 1.01E-04 | 0.89           | Open Sea               | Body       |

|            |               |    |           |       |          |      |             |      |
|------------|---------------|----|-----------|-------|----------|------|-------------|------|
| cg15324756 | <i>COL4A2</i> | 13 | 110961142 | -0.69 | 4.73E-05 | 0.83 | Island      | Body |
| cg03640051 | <i>ATP8A1</i> | 4  | 42657689  | 0.86  | 7.69E-05 | 0.89 | North Shore |      |

---

\*Log fold change is the difference in M-values ( $\log_2$  methylation) of south Durban compared to north Durban

\*\*By Benjamini Hochberg method, based on 433,782 models.

**Supplemental Table II. Top Differentially Methylated Sites by Maternal HIV Status.** Results are shown from the model adjusting for gestational age, gender, and region of Durban (n=22). Top sites were selected by HIV status that had  $p < 0.0001$  in models adjusting for gestational age and gender (with or without adjustment for air pollution exposure group).

| Probe ID       | Gene Symbol    | Chr | Position  | log Fold Change* | P-Value  | adj. P-Value** | Relative to CpG Island | Annotation |
|----------------|----------------|-----|-----------|------------------|----------|----------------|------------------------|------------|
| cg17820299     | <i>POLDIP3</i> | 22  | 43011819  | -1.03            | 1.67E-05 | 0.46           | South Shore            | TSS 1500   |
| cg20402079     | <i>RHOBTB3</i> | 5   | 95066792  | -1.11            | 1.99E-05 | 0.46           | North Shore            | TSS 200    |
| cg12319534     |                | 4   | 54959841  | -0.83            | 1.13E-05 | 0.46           | South Shore            |            |
| cg22758680     | <i>ZNF398</i>  | 7   | 148846616 | 0.68             | 3.42E-05 | 0.46           | South Shore            | 5' UTR     |
| cg18252731     | <i>FAM174B</i> | 15  | 93198700  | -1.07            | 3.15E-05 | 0.46           | Island                 | 1st Exon   |
| cg11114853     | <i>DTYMK</i>   | 2   | 242626719 | -1.18            | 3.60E-05 | 0.46           | Island                 | TSS 1500   |
| cg00939727     |                | 2   | 134935506 | -0.64            | 7.35E-05 | 0.46           | Open Sea               |            |
| cg13594151     | <i>ZNF44</i>   | 19  | 12405719  | -0.94            | 4.57E-05 | 0.46           | South Shore            | TSS 200    |
| cg17322000     | <i>TOP1MT</i>  | 8   | 144408126 | -0.92            | 7.33E-05 | 0.46           | Open Sea               | Body       |
| cg24001801     |                | 7   | 9057127   | -0.91            | 3.65E-05 | 0.46           | Open Sea               |            |
| cg26539615     | <i>TULP2</i>   | 19  | 49402007  | 0.65             | 8.82E-05 | 0.46           | North Shore            | TSS 200    |
| ch.19.1200890F |                | 19  | 37240674  | -0.97            | 8.14E-05 | 0.46           | Open Sea               |            |

\*Log fold change is the difference in M-values ( $\log_2$  methylation) of HIV positive exposure compared to HIV negative

\*\*By Benjamini Hochberg method, based on 433,782 models.

**Supplemental Table III. Top Gene Ontology or Function Pathways by Air Pollution Exposure Analysis.** Full results from

LRpath gene set enrichment testing are displayed for concepts significant at a 10% FDR level.

| Name                                                          | Concept Type | # Genes in Concept | Coefficient | Odds Ratio | P-Value  | FDR q | Direction <sup>†</sup> |
|---------------------------------------------------------------|--------------|--------------------|-------------|------------|----------|-------|------------------------|
| Ascorbate and aldarate metabolism                             | KEGG         | 19                 | -1.28       | 3.49E-04   | 1.54E-05 | 0.003 | ↑                      |
| oxygen transport                                              | GOBP         | 11                 | -1.68       | 2.90E-05   | 9.58E-07 | 0.005 | ↓                      |
| Pentose and glucuronate interconversions                      | KEGG         | 24                 | -1.17       | 7.10E-04   | 6.50E-05 | 0.007 | ↓                      |
| Drug metabolism - cytochrome P450                             | KEGG         | 62                 | -0.94       | 2.92E-03   | 1.80E-04 | 0.013 | ↓                      |
| Drug metabolism - other enzymes                               | KEGG         | 39                 | -1.00       | 1.99E-03   | 3.17E-04 | 0.017 | ↓                      |
| oxygen binding                                                | GOMF         | 32                 | -1.33       | 2.55E-04   | 2.04E-05 | 0.019 | ↓                      |
| Retinol metabolism                                            | KEGG         | 54                 | -0.91       | 3.42E-03   | 5.58E-04 | 0.024 | ↓                      |
| Other types of O-glycan biosynthesis                          | KEGG         | 37                 | -0.97       | 2.34E-03   | 6.74E-04 | 0.024 | ↓                      |
| gas transport                                                 | GOBP         | 15                 | -1.50       | 8.70E-05   | 1.51E-05 | 0.025 | ↓                      |
| detection of chemical stimulus involved in sensory perception | GOBP         | 357                | 0.68        | 70.29      | 1.54E-05 | 0.025 | ↑                      |
| RNA splicing, via endonucleolytic cleavage and ligation       | GOBP         | 10                 | -1.61       | 4.65E-05   | 2.54E-05 | 0.029 | ↓                      |
| detection of chemical stimulus                                | GOBP         | 388                | 0.64        | 54.93      | 3.90E-05 | 0.029 | ↑                      |
| cellular glucuronidation                                      | GOBP         | 13                 | -1.51       | 8.34E-05   | 4.08E-05 | 0.029 | ↓                      |
| uronic acid metabolic process                                 | GOBP         | 14                 | -1.48       | 9.83E-05   | 4.72E-05 | 0.029 | ↓                      |
| glucuronate metabolic process                                 | GOBP         | 14                 | -1.48       | 9.83E-05   | 4.72E-05 | 0.029 | ↓                      |
| Metabolism of xenobiotics by cytochrome P450                  | KEGG         | 63                 | -0.86       | 4.81E-03   | 9.74E-04 | 0.030 | ↓                      |
| sensory perception of chemical stimulus                       | GOBP         | 403                | 0.63        | 49.35      | 5.74E-05 | 0.031 | ↑                      |
| glucuronosyltransferase activity                              | GOMF         | 22                 | -1.39       | 1.78E-04   | 7.36E-05 | 0.031 | ↓                      |
| olfactory receptor activity                                   | GOMF         | 320                | 0.65        | 55.65      | 1.02E-04 | 0.031 | ↑                      |
| detection of stimulus involved in sensory perception          | GOBP         | 396                | 0.63        | 48.97      | 6.59E-05 | 0.032 | ↑                      |

| Name (Table I continued)                                                                                                                         | Concept Type | # Genes in Concept | Coefficient | Odds Ratio | P-Value  | FDR q | Direction |
|--------------------------------------------------------------------------------------------------------------------------------------------------|--------------|--------------------|-------------|------------|----------|-------|-----------|
| negative regulation of intrinsic apoptotic signaling pathway in response to DNA damage                                                           | GOBP         | 23                 | 1.06        | 744.26     | 7.37E-05 | 0.033 | ↑         |
| detection of chemical stimulus involved in sensory perception of smell                                                                           | GOBP         | 320                | 0.64        | 54.31      | 1.16E-04 | 0.047 | ↑         |
| Porphyrin and chlorophyll metabolism                                                                                                             | KEGG         | 33                 | -0.94       | 2.85E-03   | 1.92E-03 | 0.051 | ↓         |
| diacylglycerol binding                                                                                                                           | GOMF         | 10                 | 1.15        | 1239.89    | 2.71E-04 | 0.063 | ↑         |
| Starch and sucrose metabolism                                                                                                                    | KEGG         | 38                 | -0.90       | 3.74E-03   | 2.68E-03 | 0.063 | ↓         |
| regulation of collateral sprouting                                                                                                               | GOBP         | 12                 | -1.48       | 1.03E-04   | 1.76E-04 | 0.067 | ↓         |
| Olfactory transduction                                                                                                                           | KEGG         | 337                | 0.46        | 17.86      | 3.34E-03 | 0.071 | ↑         |
| negative regulation of fibroblast proliferation                                                                                                  | GOBP         | 23                 | 1.02        | 582.40     | 2.41E-04 | 0.085 | ↑         |
| negative regulation of response to DNA damage stimulus                                                                                           | GOBP         | 37                 | 0.95        | 358.40     | 2.86E-04 | 0.086 | ↑         |
| regulation of intrinsic apoptotic signaling pathway in response to DNA damage                                                                    | GOBP         | 30                 | 0.98        | 436.26     | 2.88E-04 | 0.086 | ↑         |
| sensory perception of smell                                                                                                                      | GOBP         | 344                | 0.60        | 42.06      | 2.97E-04 | 0.086 | ↑         |
| purinergic nucleotide receptor activity                                                                                                          | GOMF         | 14                 | 1.06        | 742.10     | 6.33E-04 | 0.098 | ↑         |
| nucleotide receptor activity                                                                                                                     | GOMF         | 14                 | 1.06        | 742.10     | 6.33E-04 | 0.098 | ↑         |
| negative regulation of adaptive immune response based on somatic recombination of immune receptors built from immunoglobulin superfamily domains | GOBP         | 13                 | -1.42       | 1.43E-04   | 3.64E-04 | 0.100 | ↓         |

† Up direction signifies that most genes in the concept were hypermethylated in the south Durban group compared with the north Durban group. Vice versa for the down direction.

**Supplemental Table IV. Top Gene Ontology or Function Pathways by Maternal HIV Status.** Full results from LRpath gene set

enrichment testing are displayed for concepts significant at a 10% FDR level.

| Name                                                                   | Concept Type | # Genes in Concept | Coefficient | Odds Ratio | P-Value  | FDR q    | Direction <sup>†</sup> | Viral Related <sup>‡</sup> |
|------------------------------------------------------------------------|--------------|--------------------|-------------|------------|----------|----------|------------------------|----------------------------|
| olfactory receptor activity                                            | GOMF         | 320                | -1.26       | 3.90E-04   | 4.14E-39 | 3.83E-36 | ↓                      |                            |
| detection of chemical stimulus involved in sensory perception          | GOBP         | 357                | -1.23       | 4.82E-04   | 1.54E-39 | 7.59E-36 | ↓                      |                            |
| detection of chemical stimulus involved in sensory perception of smell | GOBP         | 320                | -1.24       | 4.61E-04   | 1.10E-38 | 1.91E-35 | ↓                      |                            |
| sensory perception of chemical stimulus                                | GOBP         | 403                | -1.19       | 6.17E-04   | 1.16E-38 | 1.91E-35 | ↓                      |                            |
| detection of stimulus involved in sensory perception                   | GOBP         | 396                | -1.19       | 6.27E-04   | 2.59E-38 | 3.19E-35 | ↓                      |                            |
| sensory perception of smell                                            | GOBP         | 344                | -1.21       | 5.57E-04   | 8.28E-38 | 8.15E-35 | ↓                      |                            |
| detection of chemical stimulus                                         | GOBP         | 388                | -1.18       | 6.73E-04   | 1.97E-37 | 1.62E-34 | ↓                      |                            |
| Olfactory transduction                                                 | KEGG         | 337                | -1.43       | 1.36E-04   | 6.24E-33 | 1.33E-30 | ↓                      |                            |
| detection of stimulus                                                  | GOBP         | 553                | -1.02       | 1.72E-03   | 1.50E-32 | 1.06E-29 | ↓                      |                            |
| sensory perception                                                     | GOBP         | 758                | -0.87       | 4.42E-03   | 8.62E-27 | 5.31E-24 | ↓                      |                            |
| G-protein coupled receptor activity                                    | GOMF         | 705                | -0.86       | 4.92E-03   | 2.12E-24 | 9.80E-22 | ↓                      |                            |
| Ascorbate and aldarate metabolism                                      | KEGG         | 19                 | -1.18       | 6.36E-04   | 3.12E-08 | 3.32E-06 | ↓                      |                            |
| Retinol metabolism                                                     | KEGG         | 54                 | -0.95       | 2.78E-03   | 1.08E-07 | 7.46E-06 | ↓                      |                            |
| Pentose and glucuronate interconversions                               | KEGG         | 24                 | -1.10       | 1.10E-03   | 1.40E-07 | 7.46E-06 | ↓                      |                            |
| Metabolism of xenobiotics by cytochrome P450                           | KEGG         | 63                 | -0.89       | 4.06E-03   | 4.25E-07 | 1.81E-05 | ↓                      |                            |
| glucuronosyltransferase activity                                       | GOMF         | 22                 | -1.09       | 1.15E-03   | 5.92E-08 | 1.83E-05 | ↓                      |                            |
| Starch and sucrose metabolism                                          | KEGG         | 38                 | -0.95       | 2.65E-03   | 1.12E-06 | 3.49E-05 | ↓                      |                            |
| Drug metabolism - cytochrome P450                                      | KEGG         | 62                 | -0.86       | 4.67E-03   | 1.23E-06 | 3.49E-05 | ↓                      |                            |
| Steroid hormone biosynthesis                                           | KEGG         | 47                 | -0.91       | 3.46E-03   | 1.31E-06 | 3.49E-05 | ↓                      |                            |
| Porphyrin and chlorophyll metabolism                                   | KEGG         | 33                 | -0.95       | 2.66E-03   | 3.13E-06 | 7.42E-05 | ↓                      |                            |
| Other types of O-glycan biosynthesis                                   | KEGG         | 37                 | -0.91       | 3.59E-03   | 8.72E-06 | 1.86E-04 | ↓                      |                            |
| Drug metabolism - other enzymes                                        | KEGG         | 39                 | -0.84       | 5.49E-03   | 6.90E-05 | 0.001    | ↓                      |                            |
| cellular glucuronidation                                               | GOBP         | 13                 | -1.10       | 1.07E-03   | 4.49E-06 | 0.002    | ↓                      |                            |



| Name (Table II continued)                                                                                    | Concept Type | # Genes in Concept | Coefficient | Odds Ratio | P-Value  | FDR q | Direction | Viral Related |
|--------------------------------------------------------------------------------------------------------------|--------------|--------------------|-------------|------------|----------|-------|-----------|---------------|
| uronic acid metabolic process                                                                                | GOBP         | 14                 | -1.08       | 1.20E-03   | 5.13E-06 | 0.002 | ↓         |               |
| glucuronate metabolic process                                                                                | GOBP         | 14                 | -1.08       | 1.20E-03   | 5.13E-06 | 0.002 | ↓         |               |
| Taste transduction                                                                                           | KEGG         | 48                 | -0.68       | 1.48E-02   | 2.53E-03 | 0.045 | ↓         |               |
| translation initiation factor binding                                                                        | GOMF         | 20                 | 0.82        | 167.79     | 2.24E-04 | 0.052 | ↑         |               |
| protein self-association                                                                                     | GOMF         | 36                 | 0.75        | 102.61     | 3.33E-04 | 0.052 | ↑         |               |
| myosin binding                                                                                               | GOMF         | 34                 | 0.80        | 146.00     | 3.63E-04 | 0.052 | ↑         |               |
| ubiquitin binding                                                                                            | GOMF         | 68                 | 0.67        | 66.19      | 4.71E-04 | 0.052 | ↑         |               |
| small conjugating protein binding                                                                            | GOMF         | 80                 | 0.66        | 61.78      | 4.79E-04 | 0.052 | ↑         |               |
| endonuclease activity, active with either ribo- or deoxyribonucleic acids and producing 3'-phosphomonoesters | GOMF         | 14                 | -0.97       | 2.34E-03   | 5.05E-04 | 0.052 | ↓         |               |
| negative regulation of fibroblast proliferation                                                              | GOBP         | 23                 | 0.77        | 121.80     | 2.00E-04 | 0.069 | ↑         |               |
| negative regulation of intrinsic apoptotic signaling pathway in response to DNA damage                       | GOBP         | 23                 | 0.81        | 153.83     | 2.14E-04 | 0.069 | ↑         |               |
| negative regulation of viral process                                                                         | GOBP         | 71                 | 0.77        | 121.38     | 2.52E-04 | 0.069 | ↑         | *             |
| regulation of intrinsic apoptotic signaling pathway in response to DNA damage                                | GOBP         | 30                 | 0.77        | 121.95     | 2.52E-04 | 0.069 | ↑         |               |
| negative regulation of multi-organism process                                                                | GOBP         | 101                | 0.70        | 75.72      | 2.63E-04 | 0.069 | ↑         |               |
| negative regulation of nitrogen compound metabolic process                                                   | GOBP         | 990                | 0.36        | 9.66       | 2.66E-04 | 0.069 | ↑         |               |
| negative regulation of nucleobase-containing compound metabolic process                                      | GOBP         | 970                | 0.37        | 9.74       | 2.79E-04 | 0.069 | ↑         |               |
| viral release from host cell                                                                                 | GOBP         | 23                 | 0.86        | 203.73     | 2.81E-04 | 0.069 | ↑         | *             |
| negative regulation of response to DNA damage stimulus                                                       | GOBP         | 37                 | 0.76        | 110.64     | 2.87E-04 | 0.069 | ↑         |               |
| negative regulation of viral release from host cell                                                          | GOBP         | 14                 | 0.93        | 331.61     | 2.96E-04 | 0.069 | ↑         | *             |
| regulation of viral release from host cell                                                                   | GOBP         | 21                 | 0.88        | 238.84     | 3.06E-04 | 0.069 | ↑         | *             |
| negative regulation of viral transcription                                                                   | GOBP         | 23                 | 0.88        | 233.50     | 3.25E-04 | 0.070 | ↑         | *             |
| regulation of viral process                                                                                  | GOBP         | 147                | 0.61        | 43.10      | 3.71E-04 | 0.073 | ↑         | *             |
| negative regulation of macromolecule biosynthetic process                                                    | GOBP         | 983                | 0.36        | 9.14       | 3.72E-04 | 0.073 | ↑         |               |

| Name (Table II continued)                                                          | Concept Type | # Genes in Concept | Coefficient | Odds Ratio | P-Value  | FDR q | Direction | Viral Related |
|------------------------------------------------------------------------------------|--------------|--------------------|-------------|------------|----------|-------|-----------|---------------|
| protein ubiquitination involved in ubiquitin-dependent protein catabolic process   | GOBP         | 73                 | 0.65        | 57.40      | 4.55E-04 | 0.086 | ↑         |               |
| positive regulation of NF-kappaB transcription factor activity                     | GOBP         | 110                | 0.61        | 45.54      | 4.81E-04 | 0.086 | ↑         |               |
| regulation of viral transcription                                                  | GOBP         | 73                 | 0.64        | 54.60      | 4.89E-04 | 0.086 | ↑         | *             |
| Ubiquitin mediated proteolysis                                                     | KEGG         | 127                | 0.43        | 14.92      | 5.38E-03 | 0.088 | ↑         |               |
| positive regulation of cellular component movement                                 | GOBP         | 265                | 0.51        | 23.51      | 5.43E-04 | 0.092 | ↑         |               |
| regulation of symbiosis, encompassing mutualism through parasitism                 | GOBP         | 167                | 0.56        | 32.24      | 5.70E-04 | 0.092 | ↑         |               |
| inositol metabolic process                                                         | GOBP         | 10                 | -1.02       | 1.74E-03   | 6.07E-04 | 0.092 | ↓         |               |
| positive regulation of sequence-specific DNA binding transcription factor activity | GOBP         | 192                | 0.54        | 28.38      | 6.19E-04 | 0.092 | ↑         |               |
| negative regulation of intrinsic apoptotic signaling pathway                       | GOBP         | 65                 | 0.63        | 49.19      | 6.29E-04 | 0.092 | ↑         |               |
| gas transport                                                                      | GOBP         | 15                 | -0.94       | 2.82E-03   | 6.34E-04 | 0.092 | ↓         |               |
| positive regulation of type I interferon production                                | GOBP         | 70                 | 0.62        | 46.89      | 6.61E-04 | 0.092 | ↑         | *             |
| regulation of multi-organism process                                               | GOBP         | 279                | 0.49        | 21.11      | 6.76E-04 | 0.092 | ↑         |               |
| type I interferon production                                                       | GOBP         | 101                | 0.59        | 38.78      | 7.21E-04 | 0.092 | ↑         | *             |
| viral process                                                                      | GOBP         | 646                | 0.39        | 11.01      | 7.25E-04 | 0.092 | ↑         | *             |
| regulation of type I interferon production                                         | GOBP         | 99                 | 0.59        | 38.92      | 7.30E-04 | 0.092 | ↑         | *             |
| regulation of fibroblast proliferation                                             | GOBP         | 66                 | 0.61        | 45.03      | 7.58E-04 | 0.092 | ↑         |               |
| positive regulation of cell migration                                              | GOBP         | 251                | 0.50        | 21.92      | 7.65E-04 | 0.092 | ↑         |               |
| positive regulation of cell motility                                               | GOBP         | 258                | 0.49        | 21.08      | 8.14E-04 | 0.095 | ↑         |               |
| multi-organism cellular process                                                    | GOBP         | 654                | 0.38        | 10.50      | 8.63E-04 | 0.097 | ↑         |               |
| fibroblast proliferation                                                           | GOBP         | 69                 | 0.60        | 42.06      | 8.63E-04 | 0.097 | ↑         |               |
| solute:proton symporter activity                                                   | GOMF         | 12                 | -0.98       | 2.29E-03   | 1.07E-03 | 0.099 | ↓         |               |

† Up direction signifies that most genes in the concept were hypermethylated in the maternal HIV positive group compared with the negative group. Vice versa for the down direction.

‡ \* Denotes that the concept is involved in response to viral infection.
